# Supplementary material for: Dynamics of Cognitive Function in Patients with Heart Failure Following Transcatheter Mitral Valve Repair
Source: MDPI journal article supplement (doi:10.3390/jcm11143990), 2022-07-09
Supplement: s1 [file s1]

**Table S1.** Comparison of echocardiographic and clinical delta values in PASCAL and MitraClip.

| <b>Parameter<br/>Δ (Baseline – Follow Up)</b>        | <b>PASCAL<br/>(N=38)</b> | <b>MitraClip<br/>(N=34)</b> | <b>p-value</b> |
|------------------------------------------------------|--------------------------|-----------------------------|----------------|
| <b>LV ejection fraction [%]</b>                      | 1.4 ± 10.9               | 3.5 ± 10.0                  | 0.40           |
| <b>LV end-diastolic diameter [mm]</b>                | 1.5 [2.0; 6.0]           | 3.0 [2.0; 8.0]              | 0.45           |
| <b>LV end-diastolic volume [ml]</b>                  | 16.5 [4.0; 29.3]         | 9.5 [9.5; 32.5]             | 0.94           |
| <b>LV end-systolic diameter [mm]</b>                 | 0.3 ± 10.5               | 1.3 ± 15.1                  | 0.76           |
| <b>LV end-systolic volume [ml]</b>                   | 4.0 [3.0; 16.0]          | 3.0 [8.3; 17.0]             | 0.88           |
| <b>LA volume [ml]</b>                                | -2.6 ± 41.4              | -11.2 ± 44.6                | 0.40           |
| <b>LA volume index [ml/m<sup>2</sup>]</b>            | -1.2 ± 22.3              | -7.6 ± 23.0                 | 0.24           |
| <b>Reduction of Mitral regurgitation</b>             | 3 [2.0; 3.0]             | 2.0 [2.0; 3.0]              | 0.14           |
| <b>MR vena contracta width [mm]</b>                  | 6.0 [3.3; 8.8]           | 3.5 [2.0; 6.8]              | 0.06           |
| <b>MR EROA [cm<sup>2</sup>]</b>                      | 0.4 [0.2; 0.7]           | 0.2 [0.1; 0.5]              | 0.57           |
| <b>MR regurgitant volume [ml]</b>                    | 50.7 ± 41.4              | 36.9 ± 36.8                 | 0.15           |
| <b>Systolic pulmonary artery pressure<br/>[mmHg]</b> | 3.8 ± 16.6               | 9.0 ± 16.6                  | 0.22           |
| <b>NTproBNP</b>                                      | 161.0 [0.0; 1267.5]      | 1.0 [-267.0; 1107.5]        | 0.92           |
| <b>NYHA Class</b>                                    | 0.0 [0.0; 1.0]           | 1.0 [0.0; 1.0]              | 0.27           |
| <b>6-min-walking distance</b>                        | 30.0 [8.0; 60.0]         | 20.5 [5.5; 80.0]            | .099           |
| <b>Quality of life (MLHFQ)</b>                       | 13.5 [4.8; 31.3]         | 7.5 [0.0; 20.3]             | 0.23           |

EROA= effective regurgitation orifice area, LA= left atrial, LV= left ventricular, MR= mitral regurgitation; NT-proBNP: amino terminal pro-brain natriuretic peptide

**Table S2.** Comparison of echocardiographic and clinical delta values in primary and secondary mitral regurgitation.

| Parameter<br>Δ (Baseline – Follow Up)     | Primary MR<br>(N=31) | Secondary MR<br>(N=39) | p-value                      |
|-------------------------------------------|----------------------|------------------------|------------------------------|
| LV ejection fraction [%]                  | 3.6 ± 9.1            | 1.1 ± 11.5             | 0.38                         |
| LV end-diastolic diameter [mm]            | 2.0 [-4.0; 6.0]      | 3.0 [-2.0; 5.0]        | 0.31                         |
| LV end-diastolic volume [ml]              | 17.0 [1.0; 52.0]     | 10.0 [-12.0; 28.0]     | 0.09                         |
| LV end-systolic diameter [mm]             | 1.6 ± 11.9           | 0.1 ± 13.9             | 0.76                         |
| LV end-systolic volume [ml]               | 4.0 [-3.0; 20.0]     | 3.5 [-8.5; 12.3]       | 0.48                         |
| LA volume [ml]                            | 17.3 ± 43.6          | 0.8 ± 40.6             | 0.07                         |
| LA volume index [ml/m <sup>2</sup> ]      | 9.3 ± 24.9           | 0.9 ± 20.1             | 0.07                         |
| Reduction of mitral regurgitation         | 3.0 [2.0; 3.0]       | 2.0 [2.0; 3.0]         | <b>0.023*</b>                |
| MR vena contracta width [mm]              | 8.0 [6.0; 9.0]       | 3.0 [2.0; 5.0]         | <b>&lt;0.001*</b>            |
| MR EROA [cm <sup>2</sup> ]                | 0.6 [0.5; 0.8]       | 0.2 [0.1; 0.2]         | 0.50                         |
| MR regurgitant volume [ml]                | 70.7 ± 41.3          | 24.9 ± 24.6            | <b>&lt;0.001<sup>#</sup></b> |
| Systolic pulmonary artery pressure [mmHg] | 10.5 ± 16.1          | 2.8 ± 16.9             | 0.09                         |
| NTproBNP                                  | 173.0 [0.0; 1240.0]  | 0.5 [-372.5; 1061.3]   | 0.76                         |
| NYHA Class                                | 0.0 [0.0; 1.0]       | 0.0 [0.0; 1.0]         | 0.47                         |
| 6-min-walking distance                    | 40.0 [15.5; 74.0]    | 18.5 [3.8; 57.5]       | 0.06                         |
| Quality of life (MLHFQ)                   | 14.0 [5.0; 32.0]     | 8.0 [0.0; 19.0]        | <b>0.013*</b>                |

EROA= effective regurgitation orifice area, LA= left atrial, LV= left ventricular, MR= mitral regurgitation; NT-proBNP: amino terminal pro-brain natriuretic peptide; <sup>#</sup> = unpaired t-test; \* = Mann-Whitney-U-test

**Table S3.** Comparison of delta values in the MoCA test in primary and secondary mitral regurgitation.

| <b>Parameter<br/>Δ (Follow Up-Baseline)</b> | <b>Primary MR<br/>(N=31)</b> | <b>Secondary MR<br/>(N=39)</b> | <b>p-value</b> |
|---------------------------------------------|------------------------------|--------------------------------|----------------|
| <b>MoCA result</b>                          | 2.0 [0.0; 4.0]               | 2.0 [1.0; 4.0]                 | 0.33           |
| <b>MoCA standard deviation<br/>results</b>  | 0.7 ± 0.8                    | 0.8 ± 1.0                      | 0.68           |
| <b>Executive function</b>                   | 1.0 [0.0; 1.0]               | 1.0 [0.0; 1.0]                 | 0.42           |
| <b>Naming</b>                               | 0.0 [0.0; 0.0]               | 0.0 [0.0; 0.0]                 | 0.80           |
| <b>Memory</b>                               | 1.0 [0.0; 1.0]               | 1.0 [0.0; 2.0]                 | 0.11           |
| <b>Attention</b>                            | 0.0 [0.0; 1.0]               | 0.0 [0.0; 1.0]                 | 0.89           |
| <b>Language</b>                             | 0.0 [0.0; 1.0]               | 0.0 [-1.0; 1.0]                | 0.11           |
| <b>Abstraction</b>                          | 0.0 [0.0; 1.0]               | 1.0 [0.0; 1.0]                 | 0.21           |
| <b>Orientation</b>                          | 0.0 [0.0; 0.0]               | 0.0 [0.0; 0.0]                 | 0.93           |

MR= mitral regurgitation; MoCA= Montreal Cognitive Assessment Test.
